# Supplementary material for: Germline Variants in Cancer Predisposition Genes in Pediatric Patients with Central Nervous System Tumors
Source: MDPI journal article supplement (doi:10.3390/ijms242417387), 2023-12-12
Supplement: s1 [file s1]

**“In-house” Pediatric Brain Tumor gene list (genes that are on TSO platform)**

|        |        |        |        |        |        |
|--------|--------|--------|--------|--------|--------|
| ACD    | CTC1   | FH     | MLH1   | RAD51  | SUFU   |
| ALK    | DCLRE1 | GATA2  | MSH2   | RAD51C | TERT   |
| APC    | B      | GFRA1  | MSH3   | RAF1   | TINF2  |
| ATM    | DDB2   | GJB2   | MSH6   | RB1    | TMEM12 |
| ATRX   | DHCR7  | GLI3   | MTHFR  | RECQL4 | 7      |
| BAP1   | DICER1 | GSTO1  | MUTYH  | RET    | TP53   |
| BLM    | DIS3L2 | GSTP1  | NBN    | RRM2B  | TPP1   |
| BMPR1A | DKC1   | GSTT1  | NEFL   | RUNX1  | TSC1   |
| BRAF   | EGFR   | HNF4A  | NF1    | SAMD9  | TSC2   |
| BRCA1  | ELP1   | HRAS   | NF2    | SBDS   | UBE2T  |
| BRCA2  | EP300  | IDH1   | NOP10  | SDHA   | VHL    |
| BRIP1  | EPCAM  | IDH2   | NOTCH2 | SDHAF2 | WRN    |
| BUB1B  | ERCC2  | IGFBP3 | NRAS   | SDHB   | WT1    |
| CASP9  | ERCC3  | IL4    | NSD1   | SDHC   | XPA    |
| CBL    | ERCC4  | IL4R   | PALB2  | SDHD   | XPC    |
| CCND1  | ERCC5  | KRAS   | PAX5   | SHOC2  | XRCC1  |
| CDC73  | ETFA   | LIG1   | PIK3CA | SLX4   | XRCC2  |
| CDH1   | FANCA  | LIG4   | PMS2   | SMAD4  | XRCC3  |
| CDK4   | FANCB  | MAP2K1 | POLH   | SMARC  |        |
| CDKN1B | FANCC  | MAP2K2 | PPM1D  | A4     |        |
| CDKN2  | FANCD2 | MAX    | PRKAR1 | SMARC  |        |
| A      | FANCE  | MDM2   | A      | B1     |        |
| CDKN2B | FANCF  | MDM4   | PRKDC  | SMARC  |        |
| AS1    | FANCG  | MED13L | PTCH1  | E1     |        |
| CEBPA  | FANCI  | MEN1   | PTCH2  | SOS1   |        |
| CHEK2  | FANCL  | MGMT   | PTEN   | STEAP3 |        |
| CREBBP | FANCM  |        | PTPN11 | STK11  |        |
